# Supplementary material for: Targeting carnitine palmitoyl transferase 1A (CPT1A) induces ferroptosis and synergizes with immunotherapy in lung cancer
Source: PubMed Central journal article supplement (PMC10920667; doi:10.1038/s41392-024-01772-w), 2024-03-07
Supplement: 41392_2024_1772_MOESM1_ESM.pdf [file 41392_2024_1772_MOESM1_ESM.pdf]

## Supplementary Materials for

Targeting carnitine palmitoyl transferase 1A (CPT1A) induces ferroptosis  
and synergizes with immunotherapy in lung cancer

Lei Ma, Chong Chen, Chunxing Zhao, Tong Li, Lingyu Ma, Jiayu Jiang, Zhaojun  
Duan, Qin Si, Tsung-Hsien Chuang, Rong Xiang, Yunping Luo

Correspondence to: [chenchong86@ibms.pumc.edu.cn](mailto:chenchong86@ibms.pumc.edu.cn); [ypluo@ibms.pumc.edu.cn](mailto:ypluo@ibms.pumc.edu.cn)

**This PDF file includes:**

Figures. S1 to S8  
Tables S1 to S4

Supplementary Figure 1

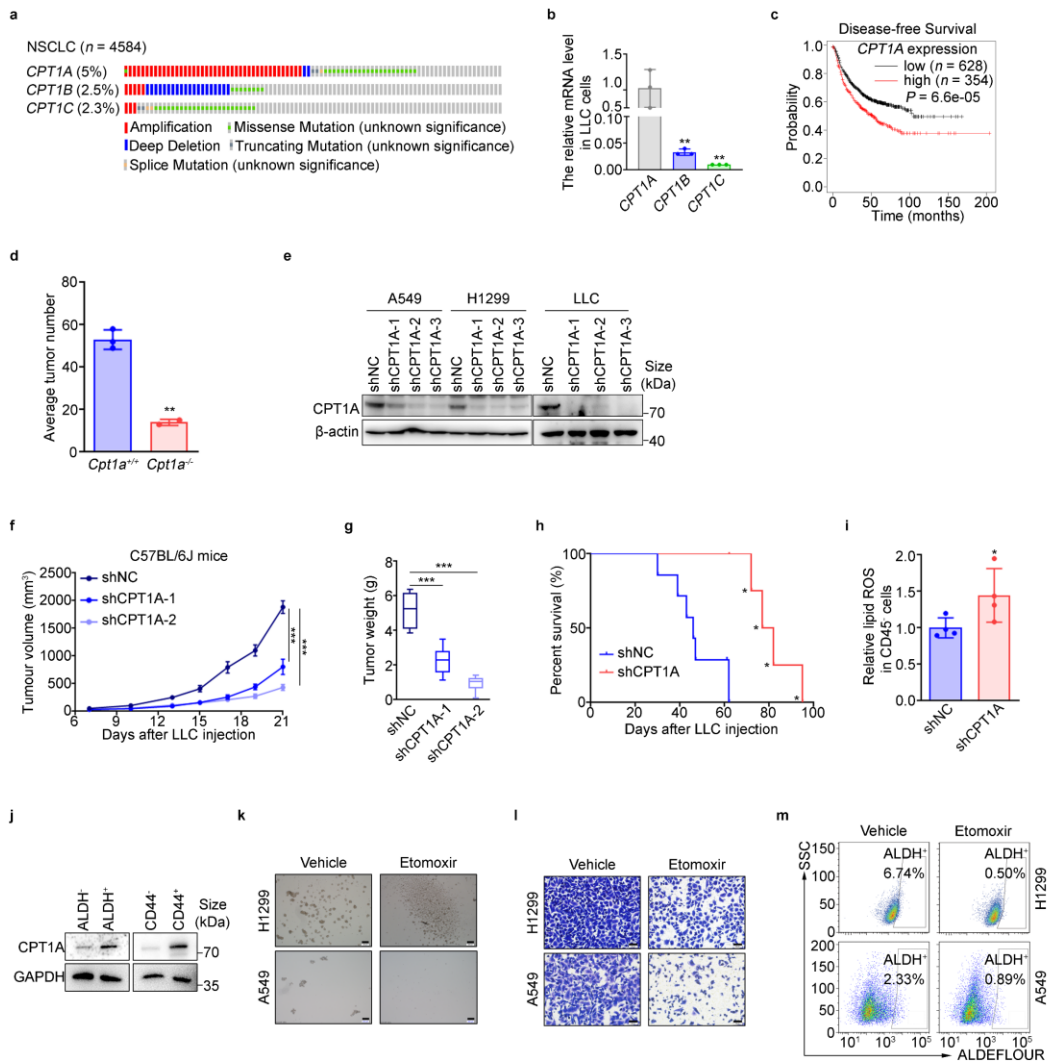

**Figure. S1.**

**CPT1A is essential for LCSCs maintenance and NSCLC progression.**

**a**, Mutation frequency of *CPT1A*, *CPT1B* and *CPT1C* genes in NSCLC patients analyzed with cBioportal website. **b**, Quantification of mRNA for *Cpt1a*, *Cpt1b* and *Cpt1c* in LLC cells. **c**, Disease-free survival of NSCLC patients stratified according to tumor CPT1A expression analyzed with Kaplan-Meier Plotter websites. **d**, Qualification of lung tumor number from SKC (*Sftpc*-CreER<sup>T2</sup>; *Kras*<sup>G12D</sup>; *Cpt1a*<sup>fllox/fllox</sup>) or control mice. **e**, Representative western blot for CPT1A in A549, H1299 and LLC cells. **f-i**, Effects of CPT1A on tumor progression in C57BL/6J mice subcutaneously transplanted with LLC-shNC/shCPT1A cells. Data represent the mean ± s.d., n = 5 samples. Tumor growth curve (**f**), tumor weights (**g**). Overall survival of tumor-bearing mice (**h**). Lipid ROS levels in CD45<sup>-</sup> cells in mouse tumor (**i**). **j**, Representative western blot for CPT1A in ALDH<sup>+/+</sup> or CD44<sup>+/+</sup> cells of H1299 cells. **k-m**, Effects of etomoxir on stemness phenotypes of H1299 and A549 cells. Sphere-forming assay Scale bars, 200 μm (insets) (**k**). Transwell assay Scale bars, 50 μm (insets) (**l**). Percentage of ALDH<sup>+</sup> cells (**m**). \*P < 0.05, \*\*P < 0.01, \*\*\*P < 0.001; significance was determined

by unpaired two-tailed Student's  $t$  test, or one way ANOVA test followed by Tukey's correction.

Supplementary Figure 2

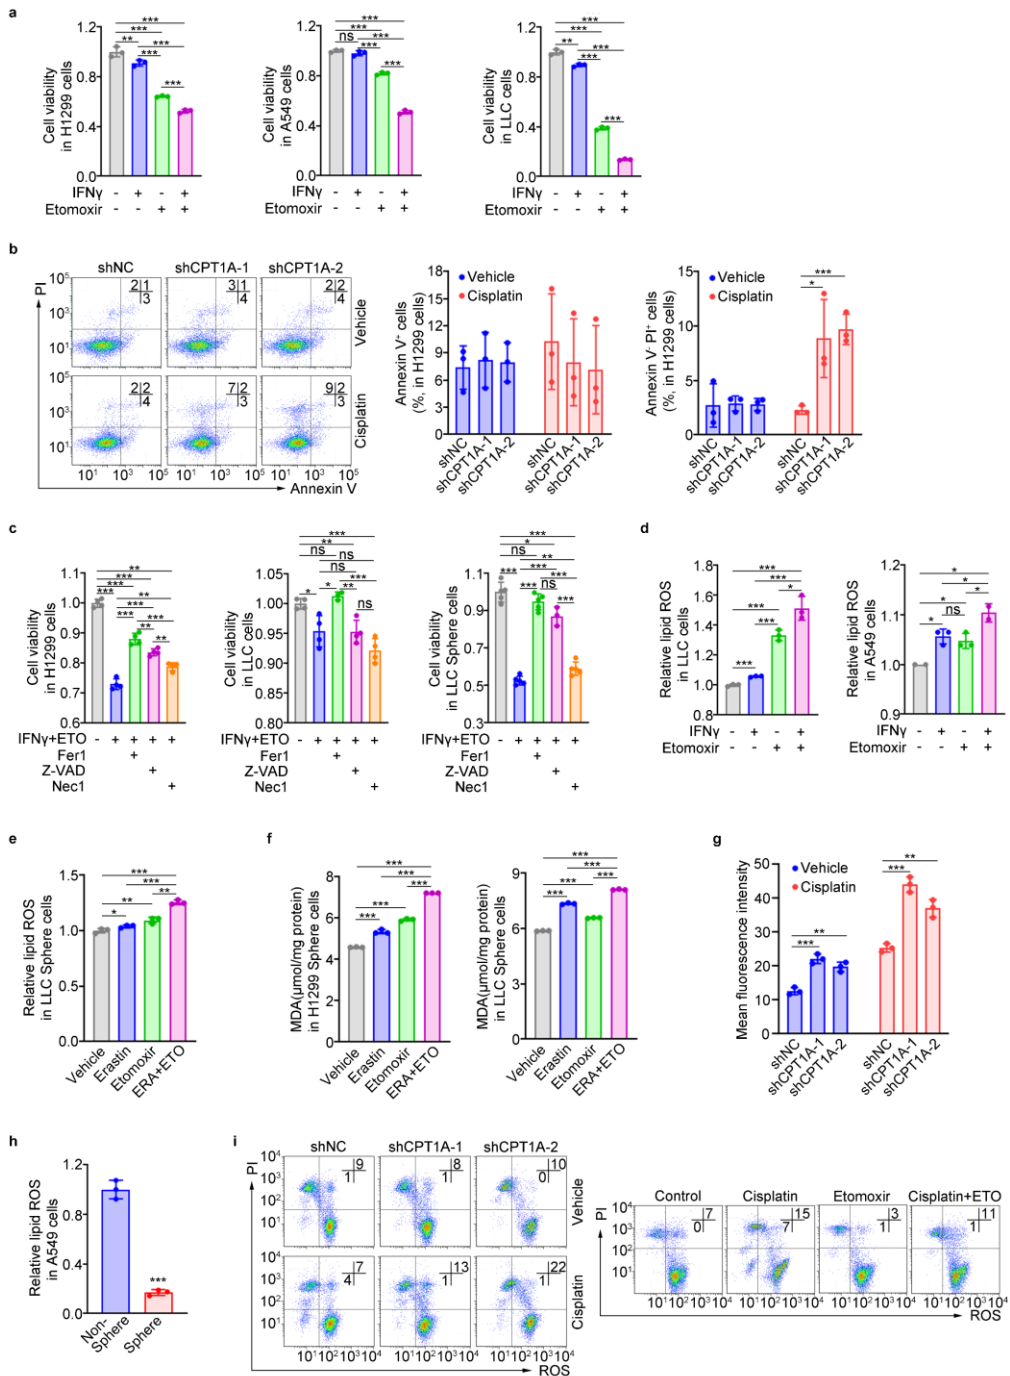

**Figure. S2.**

**CPT1A is an essential driver for the ferroptosis resistance in LCSCs.**

**a**, Cell viability of H1299 (left), A549 (middle) and LLC (right) cells treated with IFN $\gamma$  (100  $\mu$ M) or etomoxir (100  $\mu$ M) for 2 days. **b**, Percentages of AnnexinV<sup>+</sup> or AnnexinV<sup>-</sup>PI<sup>+</sup> cells in H1299-shNC/shCPT1A cells treated with DMSO or cisplatin for 2 days. **c**, Cell viability of H1299 cells (left), LLC cells (middle) or LLC sphere cells (right) treated with IFN $\gamma$  (100  $\mu$ M) or etomoxir (100  $\mu$ M) in the presence of ferostatin-1 (Fer1, 2 mM), necostatin-1 (Nec1, 1 mM), or z-VAD-FMK (z-VAD, 10 mM) for 2 days ( $n = 3$ ). **d**, Lipid ROS levels in LLC (left) and A549 (right) cells treated with IFN $\gamma$  (100  $\mu$ M)

or etomoxir (100  $\mu$ M) for 2 days determined by flow cytometry. **e**, Lipid ROS levels in LLC sphere cells treated with etomoxir (100  $\mu$ M) for 2 days and then erastin (2  $\mu$ M) for 6 h determined by flow cytometry. Data represent the mean  $\pm$  s.d.;  $n = 3$  samples. **f**, The MDA levels in H1299 (left) or LLC (right) sphere cells treated with etomoxir (100  $\mu$ M) for 2 days and then erastin (2  $\mu$ M) for 6 h determined by flow cytometry. Data represent the mean  $\pm$  s.d.;  $n = 3$  samples. **g**, Quantification of ROS levels in H1299-shNC/shCPT1A cells treated with DMSO or cisplatin for 2 days determined by flow cytometry. Data represent the mean  $\pm$  s.d.;  $n = 3$  samples. **h**, Lipid ROS levels in spheres or non-spheres of A549 cells determined by flow cytometry. **i**, Representative flow cytometry for ROS<sup>+</sup>PI<sup>+</sup> or ROS<sup>-</sup>PI<sup>-</sup> cells in H1299-shNC/shCPT1A cells treated with DMSO or cisplatin for 2 days (left) or H1299 cells treated with etomoxir, cisplatin, or both for 2 days (right). Data represent the mean  $\pm$  s.d.,  $n = 3-5$  samples. \* $P < 0.05$ , \*\* $P < 0.01$ , \*\*\* $P < 0.001$ ; significance was determined by unpaired two-tailed Student's t test, or one way ANOVA test followed by Tukey's correction.



ACSL4 siRNA determined by flow cytometry. Data represent the mean  $\pm$  s.d.,  $n = 3$  samples. **g**, Correlation analysis of *CPT1A/c-Myc* transcripts with distinct types of cellular death in NSCLC patients by informatic analysis. \* $P < 0.05$ , \*\* $P < 0.01$ , \*\*\* $P < 0.001$ ; ns: not significant. The statistical analysis was performed using a two-tailed Student's t-test.

Supplementary Figure 4

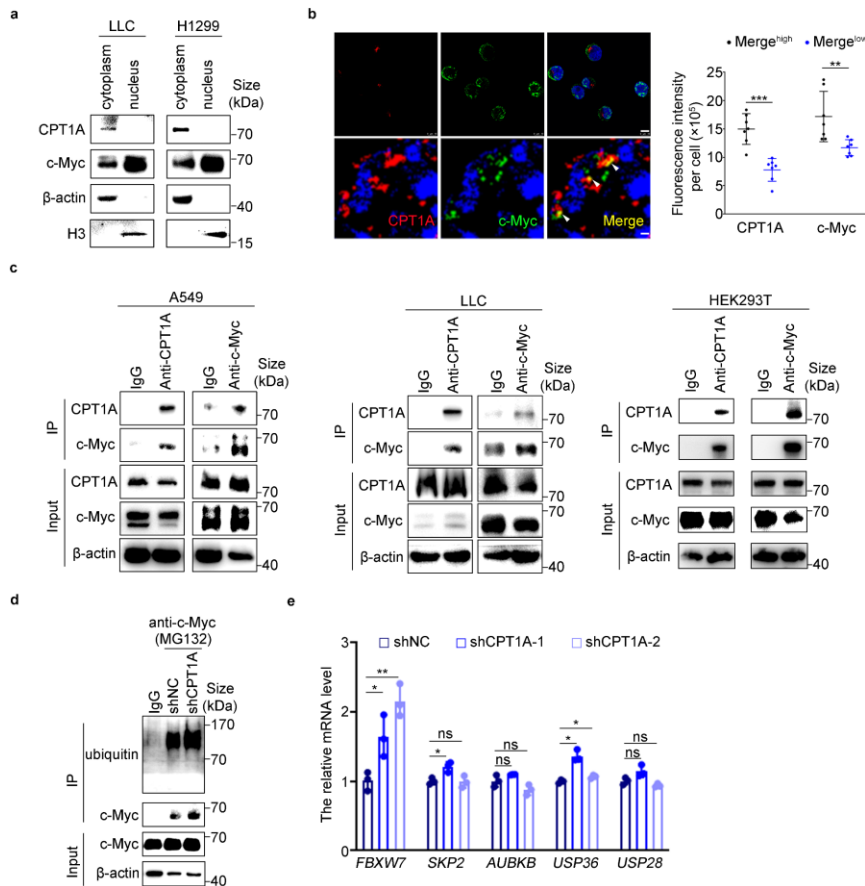

**Figure. S4.**

**CPT1A inhibits ubiquitination degradation of c-Myc.**

**a**, Representative western blot for CPT1A, c-Myc, β-actin and Histone H3 in cytoplasm or nucleus of H1299/LLC cells. **b**, Representative immunofluorescence staining for CPT1A and c-Myc in H1299 cells. Scale bar: 10 μm (up); 0.5 μm (down). Quantifications of immunofluorescence are shown on the right. Data represent the mean ± s.d., n = 7 samples. **c**, Co-immunoprecipitation with CPT1A or c-Myc antibody and representative western blot for CPT1A and c-Myc in A549 (left), LLC (middle) and HEK293T (right) cells. **d**, Co-Immunoprecipitation with c-Myc antibody and representative western blot for ubiquitin and c-Myc in H1299-shNC/shCPT1A cells treated with MG132 (10 μM) for 12 h. **e**, Quantification of mRNA for *FBXW7*, *SKP2*, *AUBKB*, *USP36*, and *USP28* in H1299-shNC/shCPT1A cells. \*P < 0.05, \*\*P < 0.01, \*\*\*P < 0.001; significance was determined by unpaired two-tailed Student's t test, or one way ANOVA test followed by Tukey's correction.



Supplementary Figure 5

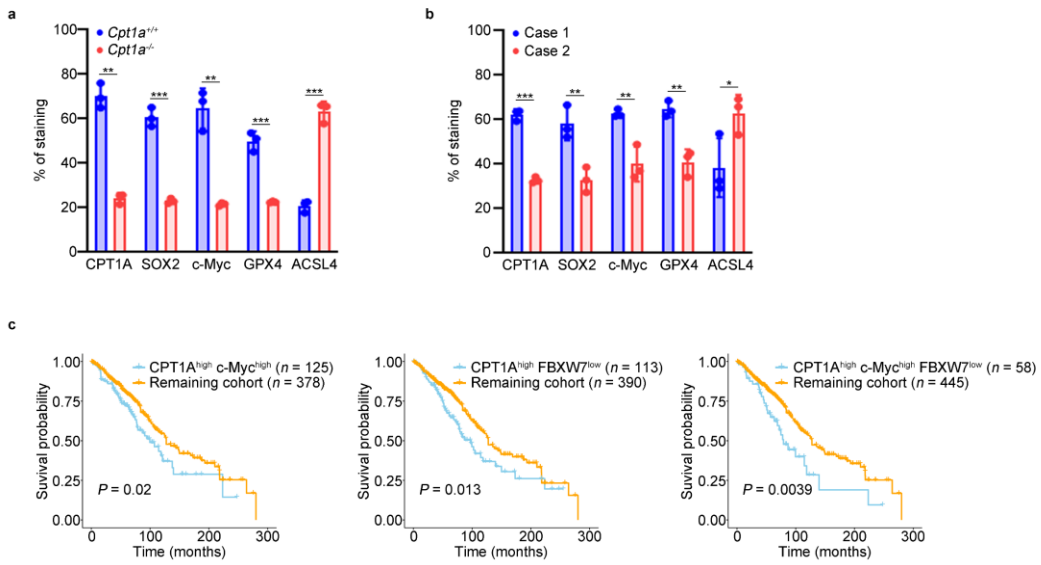

**Figure. S5.**

**The clinical significance of CPT1A, c-Myc and FBXW7 in NSCLC patients.**

**a**, Qualification of IHC staining for CPT1A, SOX2, c-Myc, GPX4 and ACSL4 in the tumor of *Cpt1a*<sup>+/+</sup> or *Cpt1a*<sup>-/-</sup> transgenic mice **b**, Qualification of IHC staining for CPT1A, SOX2, c-Myc, GPX4 and ACSL4 in the tumor of NSCLC patients. **c**, Overall survival (OS) of NSCLC patients stratified according to the expression of *CPT1A*, *c-Myc* and *FBXW7*. \* $P < 0.05$ , \*\* $P < 0.01$ , \*\*\* $P < 0.001$ ; ns: not significant. The statistical analysis was performed using a two-tailed Student's t-test, Pearson's correlation test or log-rank (Mantel–Cox) test.

Supplementary Figure 6

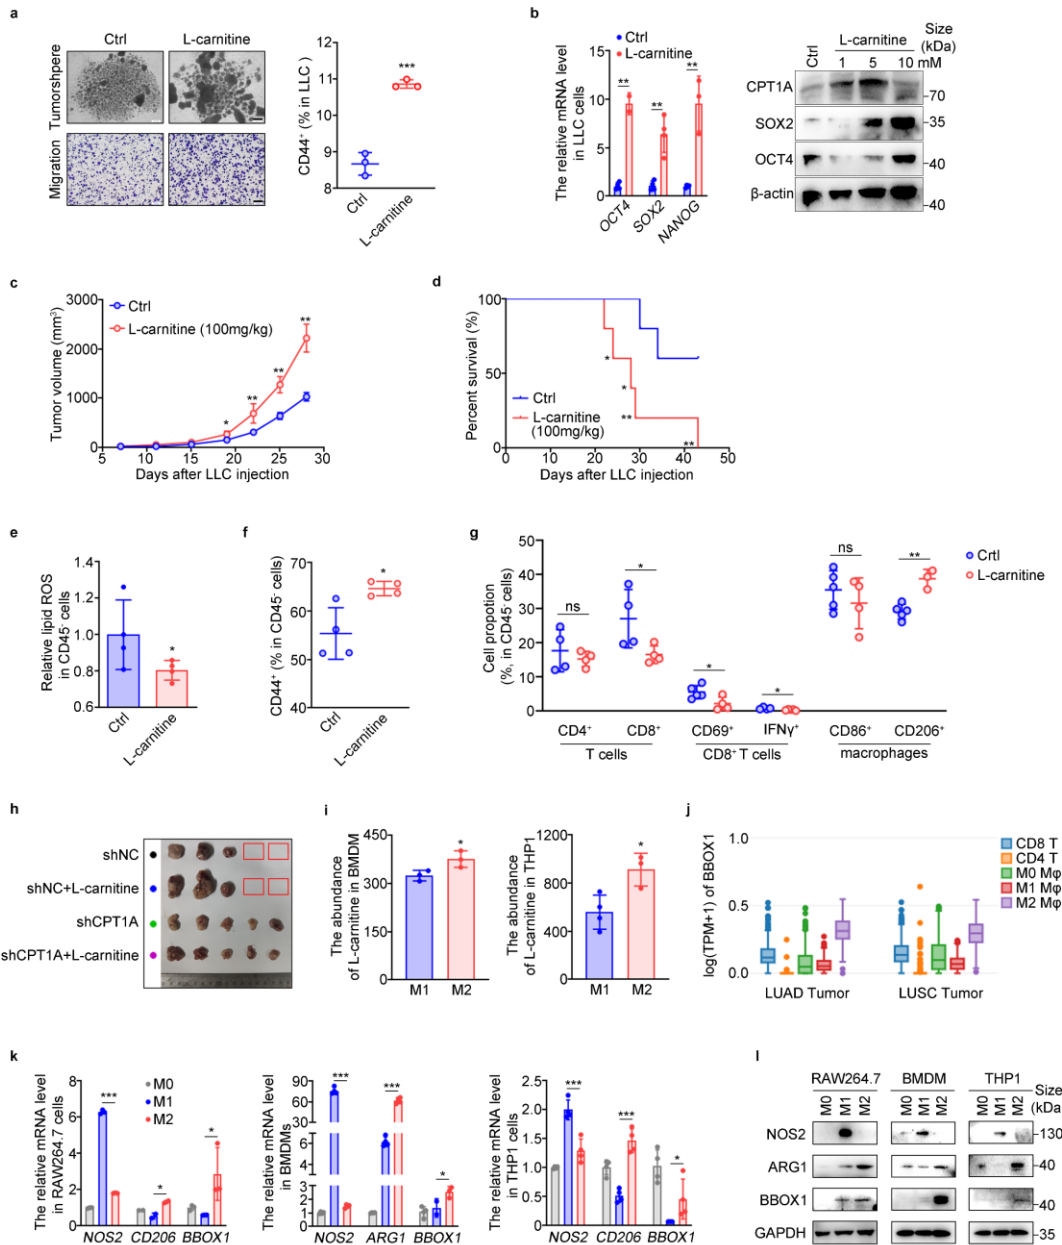

**Figure. S6.**

**L-carnitine promotes cancer stemness and ferroptosis resistance in lung cancer.**

**a**, Effects of L-carnitine on stemness phenotypes of LLC cells. Sphere-forming assay (up). Scale bar: 100  $\mu\text{m}$ . Transwell assay (down). Scale bar: 100  $\mu\text{m}$ . Percentage of CD44<sup>+</sup> cells (right). **b**, Quantification of mRNA for *OCT4*, *SOX2* and *NANOG* (left) and representative western blot for CPT1A, SOX2 and OCT4 in LLC cells treated with L-carnitine or not. **c-g**, Effects of L-carnitine on tumor progression in tumor-bearing mice inoculated with LLC-shNC/shCPT1A cells ( $n = 5$ ). C57BL/6J mice subcutaneously transplanted with LLC-shNC/shCPT1A cells ( $1 \times 10^6$  cells/100  $\mu\text{L}$ ), intragastric administration of L-carnitine for 22 days, and sacrificed at day 28. Tumor growth curve (data represent the mean  $\pm$  s.e.m.) (**c**). Overall survival of tumor-bearing mice (**d**). Lipid ROS levels of CD45<sup>+</sup> cells in mouse tumor (**e**). Percentage of CD44<sup>+</sup>

tumor cells in the mouse tumor (f). Percentage of distinct immune cells in the mouse tumor (g). h, Tumor photograph of the mice inoculated with LLC-shNC/shCPT1A cells and treated with L-carnitine (IG, 100 mg/kg). i, L-carnitine levels in BMDM or THP1 cells calculated by LC-MS. Data represent the mean  $\pm$  s.d.,  $n = 3$  samples. j, Expression levels of *BBOX1* in CD8<sup>+</sup> T cells, CD4<sup>+</sup> T cells or macrophages-M0/M1/M2 in the tumor of NSCLC patients, respectively analyzed with TIMER2 website. k, Quantification of mRNA for *NOS2*, *CD206*, *ARG1* and *BBOX1* in RAW264.7, BMDM and THP-1 cells. Data represent the mean  $\pm$  s.d.,  $n = 3$  samples. l, Representative western blot for *NOS2*, *ARG1* and *BBOX1* in RAW264.7, BMDM and THP-1 cells. \* $P < 0.05$ , \*\* $P < 0.01$ , \*\*\* $P < 0.001$ ; significance was determined by unpaired two-tailed Student's t test or one way ANOVA test.

Supplementary Figure 7

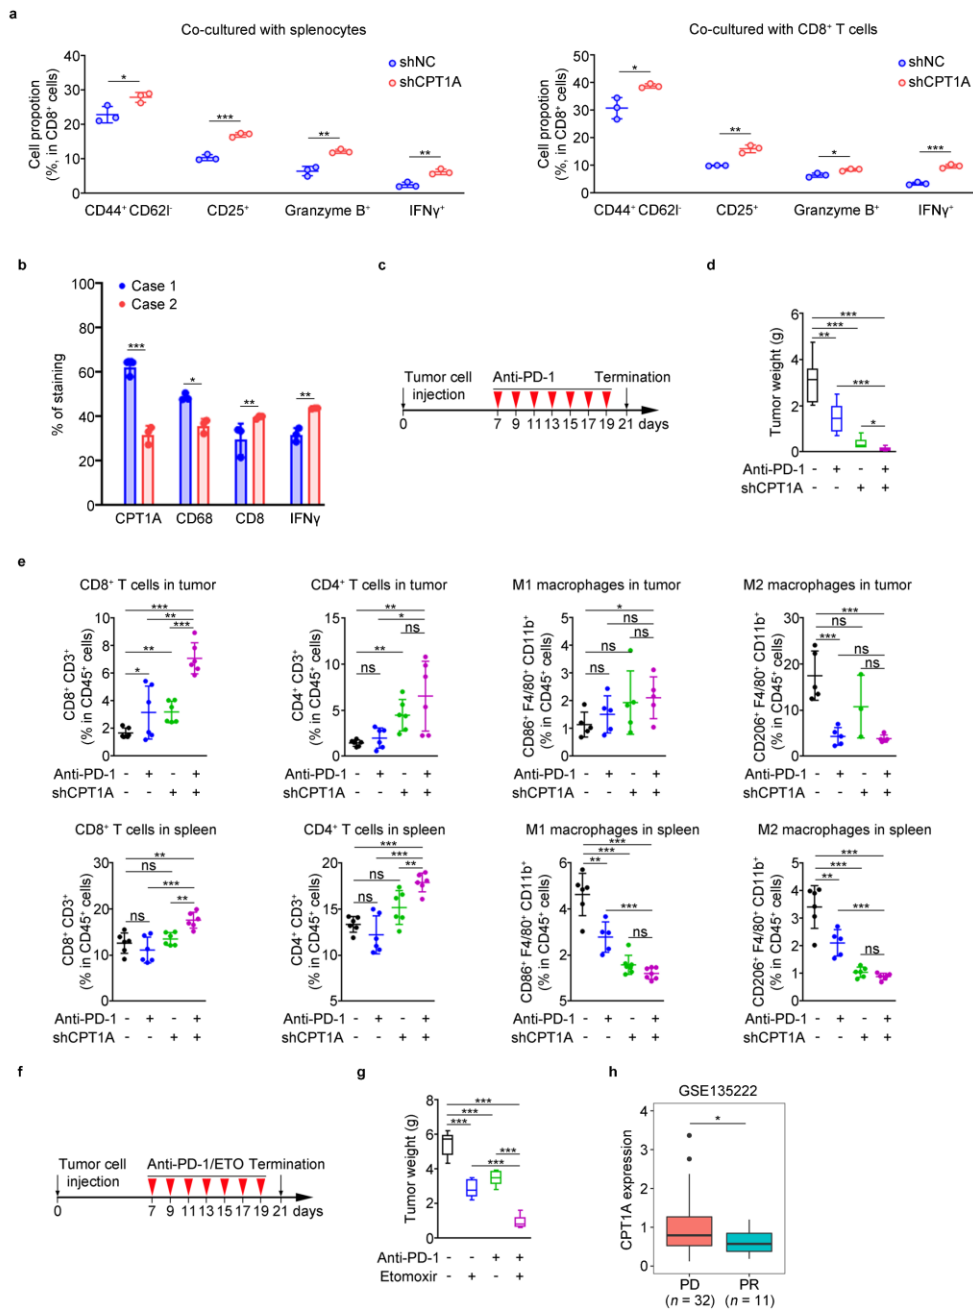

**Figure. S7.**

**Targeting CPT1A promotes the anti-tumoral immunity in lung cancer.**

**a**, Phenotype of CD8<sup>+</sup> T cells (isolated from the spleen of tumor-bearing mice) co-cultured with LLC-shNC/shCPT1A cells determined by flow cytometry. **b**, Qualification of IHC staining for CPT1A, CD68, CD8 and IFN $\gamma$  in the tumor of NSCLC patients. **c-d**, Effects of PD-1 antibody on tumor progression in tumor-bearing mice inoculated with LLC-shNC/shCPT1A cells ( $n = 7$ ). Experimental scheme. C57BL/6J mice were subcutaneously transplanted with LLC-shNC/shCPT1A cells ( $1 \times 10^6$  cells/100  $\mu$ L), intraperitoneal injection of PD-1 antibody for seven times and were sacrificed at day 21 (**c**). Tumor weight (**d**). **e**, Quantification of CD4<sup>+</sup> T cells, CD8<sup>+</sup> T

cells, CD86<sup>+</sup> macrophages, and CD206<sup>+</sup> macrophages gated on CD45<sup>+</sup> cells in the tumor or spleen from tumor-bearing mice determined by flow cytometry. **f-g**, Effects of PD-1 antibody and etomoxir on tumor progression in tumor-bearing mice inoculated with LLC-shNC/shCPT1A cells ( $n = 6$ ). Experimental scheme. C57BL/6J mice were subcutaneously transplanted with LLC-shNC/shCPT1A cells ( $1 \times 10^6$  cells/100  $\mu$ L), intraperitoneal injection of PD-1 antibody or etomoxir for seven times and were sacrificed at day 21 (**f**). Tumor weight (**g**). **h**, *CPT1A* expression in NSCLC patients with PD-1-blocked immunotherapy by bioinformatic analysis. (PD: progressive disease. PR: partial response). \* $P < 0.05$ , \*\* $P < 0.01$ , \*\*\* $P < 0.001$ ; ns: not significant. The statistical analysis was performed using a two-tailed Student's t-test.

Supplementary Figure 8

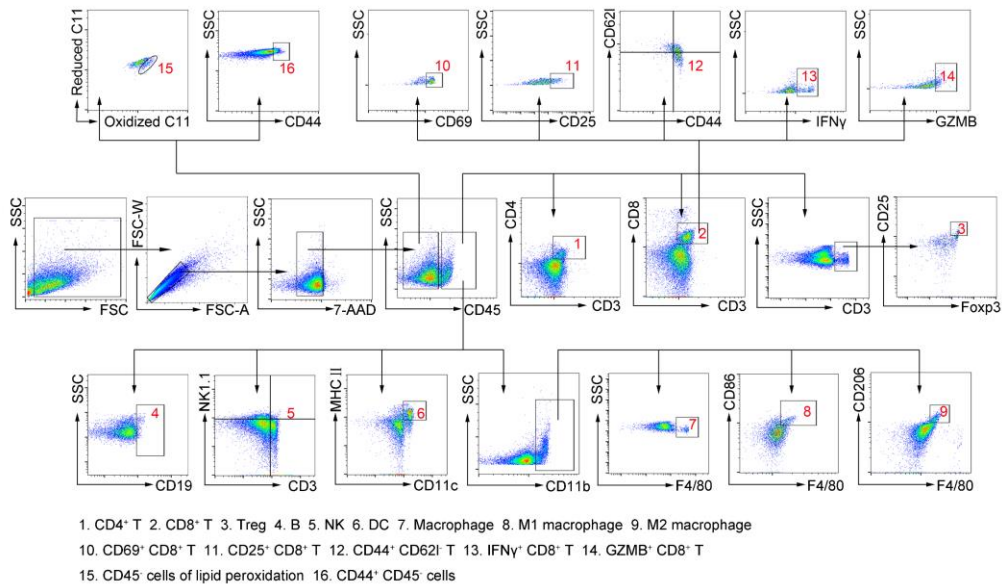

**Figure. S8.**

**Gating strategy for flow cytometry.**

Gating strategy for flow cytometry to identify distinct cell populations in mouse tumor or spleen. CD4<sup>+</sup> T cells (CD3<sup>+</sup>, CD8<sup>+</sup>), CD8<sup>+</sup> T cells (CD3<sup>+</sup>, CD8<sup>+</sup>), Treg cells (CD3<sup>+</sup>, CD25<sup>+</sup>, Foxp3<sup>+</sup>), B cells (CD19<sup>+</sup>), NK cells (CD3<sup>+</sup>, NK1.1<sup>+</sup>), DC cells (CD11c<sup>+</sup>, MHC II<sup>+</sup>), Macrophages (CD11b<sup>+</sup>, F4/80<sup>+</sup>), M1 macrophages (CD11b<sup>+</sup>, F4/80<sup>+</sup>, CD86<sup>+</sup>), M2 macrophages (CD11b<sup>+</sup>, F4/80<sup>+</sup>, CD206<sup>+</sup>), CD69<sup>+</sup> CD8<sup>+</sup> T cells (CD3<sup>+</sup>, CD8<sup>+</sup>, CD69<sup>+</sup>), CD25<sup>+</sup> CD8<sup>+</sup> T cells (CD3<sup>+</sup>, CD8<sup>+</sup>, CD25<sup>+</sup>), CD44<sup>+</sup> CD62L<sup>-</sup> CD8<sup>+</sup> T cells (CD3<sup>+</sup>, CD8<sup>+</sup>, CD44<sup>+</sup>, CD62L<sup>-</sup>), IFN $\gamma$ <sup>+</sup> CD8<sup>+</sup> T cells (CD3<sup>+</sup>, CD8<sup>+</sup>, IFN $\gamma$ <sup>+</sup>), GZMB<sup>+</sup> CD8<sup>+</sup> T cells (CD3<sup>+</sup>, CD8<sup>+</sup>, GZMB<sup>+</sup>) gated on CD45<sup>+</sup> cells, lipid ROS level (oxidized C11, reduced C11) and CD44<sup>+</sup> cells gated on CD45<sup>-</sup> cells.

**Table S1.**

Key resources tables.

| <b>REAGENT or RESOURCE</b>                     | <b>SOURCE</b>                | <b>IDENTIFIER</b>  |
|------------------------------------------------|------------------------------|--------------------|
| CPT1A Polyclonal antibody                      | Proteintech                  | Cat No: 15184-1-AP |
| CPT1A Monoclonal antibody                      | Proteintech                  | Cat No: 66039-1-Ig |
| c-MYC Polyclonal antibody                      | Proteintech                  | Cat No: 10828-1-AP |
| c-MYC Monoclonal antibody                      | Proteintech                  | Cat No: 67447-1-Ig |
| SOX2                                           | Abcam                        | ab59776            |
| OCT4                                           | Abcam                        | ab19857            |
| NANOG                                          | Cell Signaling<br>Technology | #4903              |
| $\beta$ -actin Recombinant antibody            | Proteintech                  | Cat No: 81115-1-RR |
| Anti-FACL4 antibody                            | Abcam                        | Cat# ab155282      |
| GPX4                                           | Abcam                        | ab125066           |
| BBOX1                                          | Abcam                        | ab189827           |
| OCTN2                                          | Abcam                        | ab180757           |
| NOX2                                           | Abcam                        | ab129068           |
| ARG1                                           | Cell Signaling<br>Technology | #93668             |
| GAPDH                                          | Cell Signaling<br>Technology | #5174              |
| Ubiquitin                                      | Proteintech                  | Cat No: 10201-2-AP |
| FBXW7                                          | Proteintech                  | Cat No: 28424-1-AP |
| NRF2                                           | Proteintech                  | Cat No: 16396-1-AP |
| Histone H3                                     | Abcam                        | ab1791             |
| Normal Rabbit IgG antibody                     | Cell Signaling<br>Technology | # 2729             |
| Mouse IgG                                      | Proteintech                  | Cat No: B900620    |
| Anti-Rabbit IgG, Light Chain<br>Specific       | Proteintech                  | Cat No: SA00001-7L |
| <b>Chemicals, peptides, and<br/>inhibitors</b> |                              |                    |
| L-carnitine                                    | Sigma-Aldrich                | C0283              |
| Cytidine                                       | Sigma-Aldrich                | C4654              |
| Phenyllactic acid                              | Sigma-Aldrich                | P7251              |
| Hippuric acid                                  | Sigma-Aldrich                | 112003             |
| Niacinamide                                    | Sigma-Aldrich                | N5535              |
| Indole                                         | Sigma-Aldrich                | I3408              |
| Sodium palmitate                               | Sigma-Aldrich                | 90951              |
| Etomoxir                                       | Sigma-Aldrich                | 236020             |
| Erastin                                        | MedChemExpress               | HY-15763           |
| Ferrostatin-1                                  | MedChemExpress               | HY-100579          |
| Necrostatin-1                                  | MedChemExpress               | HY-15760           |

|                              |                |              |
|------------------------------|----------------|--------------|
| Z-VAD-FMK                    | MedChemExpress | HY-16658B    |
| Cisplatin                    | MedChemExpress | HY-17394     |
| BODIPY™ 581/591 C11          | Thermo Fisher  | Cat# D3861   |
| 7-AAD (7-Aminoactinomycin D) | Thermo Fisher  | Cat# A1310   |
| PI (Propidium Iodide)        | Thermo Fisher  | Cat# P1304MP |

### Critical commercial assays

|                                                         |                           |           |
|---------------------------------------------------------|---------------------------|-----------|
| L-Carnitine Assay kit                                   | Abcam                     | ab83392   |
| FFA Assay kit                                           | Abcam                     | ab65341   |
| NADP/NADPH Assay kit                                    | Abcam                     | ab65349   |
| SimpleChIP® Enzymatic Chromatin IP Kit (Magnetic Beads) | Cell Signaling Technology | Cat# 9003 |
| Lillie's Ferrous Iron Stain Kit                         | Solarbio                  | G3320     |
| Nuclear and Cytoplasmic Protein Extraction Kit          | Beyotime Biotechnology    | P0027     |
| Lipid Peroxidation MDA Assay Kit                        | Beyotime Biotechnology    | S0131S    |

### Experimental models: Cell lines

|                           |      |                  |
|---------------------------|------|------------------|
| Mouse cell line: LLC      | ATCC | Cat# CRL-1642    |
| Mouse cell line: RAW264.7 | ATCC | Cat# TIB-71      |
| Human cell line: THP1     | ATCC | Cat# TIB-202     |
| Human cell line: H1299    | ATCC | Cat# CRL-5803    |
| Human cell line: A549     | ATCC | Cat# CRM-CCL-185 |

### Experimental models:

#### Organisms/strains

|                        |                   |    |
|------------------------|-------------------|----|
| Mouse: C57BL/6J        | Vital River       | NA |
| Mouse: NOD.SCID        | Laboratory        | NA |
| Mouse: transgenic mice | Vital River       | NA |
|                        | Laboratory        |    |
|                        | Shanghai Model    |    |
|                        | Organisms Center, |    |
|                        | Inc.              |    |

#### Oligonucleotides

|                     |            |                    |
|---------------------|------------|--------------------|
| ChIP-qPCR primers   | This paper | listed in Table S1 |
| Mouse-qPCR primers  | This paper | listed in Table S1 |
| Human -qPCR primers | This paper | listed in Table S1 |

#### Recombinant DNA

|                       |                       |    |
|-----------------------|-----------------------|----|
| pcDNA3.1-CPT1A -His-C | Yixiang Biotechnology | NA |
|-----------------------|-----------------------|----|



|                      |                                                              |                    |
|----------------------|--------------------------------------------------------------|--------------------|
| pcDNA3.1-3FLAG-MYC   | (Tianjin) Co., Ltd.<br>Tsingke<br>Biotechnology Co.,<br>Ltd. | NA                 |
| pLV2N-U6-Puro vector | GenePharma Co., Ltd.                                         | listed in Table S1 |

### Software and algorithms

|                             |                                                     |                                                                                       |
|-----------------------------|-----------------------------------------------------|---------------------------------------------------------------------------------------|
| Graphpad Prism 8.0 software | GraphPad<br>Software, Inc                           | <a href="https://www.graphpad.com/">https://www.graphpad.com/</a>                     |
| ImageJ                      | ImageJ: Image<br>Processing and<br>Analysis in Java | <a href="https://imagej.nih.gov/ij/">https://imagej.nih.gov/ij/</a>                   |
| FlowJo                      | Tree Star                                           | <a href="https://www.flowjo.com/">https://www.flowjo.com/</a>                         |
| Timer 2.0                   | (Li et al., 2020)                                   | <a href="http://timer.cistrome.org/">http://timer.cistrome.org/</a>                   |
| GEPIA                       | (Li et al., 2021)                                   | <a href="https://doi.org/10.1093/nar/gkab418">https://doi.org/10.1093/nar/gkab418</a> |

### Deposited Data

|                                                                |                     |           |
|----------------------------------------------------------------|---------------------|-----------|
| Gene expression profile of patient samples after immunotherapy | (Jung et al., 2019) | GSE135222 |
| Transcriptome data                                             | (Cho et al., 2020)  | GSE126044 |
|                                                                | This paper          | HRA006509 |

---

**Table S2.**

List of primers used in this study.

| <b>Primers for real-time PCR<br/>(human)</b> | <b>Primer sequence (5'-3')</b>                          |
|----------------------------------------------|---------------------------------------------------------|
| <i>CPT1A</i>                                 | F: ATCAATCGGACTCTGGAAACGG<br>R: TCAGGGAGTAGCGCATGGT     |
| <i>SOX2</i>                                  | F: AAAACAGCCCGGACCGCGTC<br>R: CTCGTGATGAACGGCCGCT       |
| <i>OCT4</i>                                  | F: AAGCGATCAAGCAGCC<br>R: GGAAAGGGACCGAGGAGTA           |
| <i>NANOG</i>                                 | F: ACCTCAGCCTCCAGCAGATGCA<br>R: GGTGCTGAGGCCTTCTGCGT    |
| <i>c-Myc</i>                                 | F: GGCTCCTGGCAAAGGTCA<br>R: CTGCGTAGTTGTGCTGATGT        |
| <i>ACSL4</i>                                 | F: CATCCCTGGAGCAGATACTCT<br>R: TCACTTAGGATTTCCCTGGTCC   |
| <i>BBOX1</i>                                 | F: CATGGCCCGATGAGCATTACA<br>R: TGAGCCCCAGTATTGGCATT     |
| <i>SLC16A9</i>                               | F: CAGGATCACGTTAGCCAATGG<br>R: AAAGAGCCACAGTTTCACCAC    |
| <i>ARG1</i>                                  | F: TGGACAGACTAGGAATTGGCA<br>R: CCAGTCCGTCAACATCAAACCT   |
| <i>MRC1</i>                                  | F: GGGTTGCTATCACTCTCTATGC<br>R: TTTCTTGTCTGTTGCCGTAGTT  |
| <i>GPX4</i>                                  | F: GAGGCAAGACCGAAGTAAACTAC<br>R: CCGAACTGGTTACACGGGAA   |
| <i>SLC7A11</i>                               | F: TCTCCAAAGGAGGTTACCTGC<br>R: AGACTCCCCTCAGTAAAGTGAC   |
| <i>ACSL3</i>                                 | F: GCCGAGTGGATGATAGCTGC<br>R: ATGGCTGGACCTCCTAGAGTG     |
| <i>LPCAT3</i>                                | F: GGCTGGATACTATTACACTGCC<br>R: GATCTTTCCCTCCGTCAAAGTAG |
| <i>NRF2</i>                                  | F: TCAGCGACGGAAAGAGTATGA<br>R: CCACTGGTTTCTGACTGGATGT   |
| <i>FBXW7</i>                                 | F: CGACGCCGAATTACATCTGTC<br>R: CGTTGAAACTGGGGTTCTATCA   |
| <i>USP36</i>                                 | F: CACCACCTCTAGCCAACTACC<br>R: GGCATCTTTTTTCAGGTCTCG    |
| <i>USP28</i>                                 | F: CACTGTTGCTACAGAACCATCT<br>R: TGGGAGACTCCAGTAGACTCA   |
| <i>SKP2</i>                                  | F: ATGCCCCAATCTTGTCCATCT<br>R: CACCGACTGAGTGATAGGTGT    |
| <i>AURKB</i>                                 | F: CGCAGAGAGATCGAAATCCAG<br>R: AGATCCTCCTCCGGTCATAAAA   |

|                |                                                           |
|----------------|-----------------------------------------------------------|
| <i>ALOX15</i>  | F: GACCCTGCTATAACCAGAGCC<br>R: ACCAGTCCCCTTGTTCATCAG      |
| <i>β-actin</i> | F: TCATGAAGTGTGACGTGGACATC<br>R: CAGGAGGAGCAATGATCTTGATCT |
| <i>GAPDH</i>   | F: GGAGCGAGATCCCTCCAAAAT<br>R: GGCTGTTGTCATACTTCTCATGG    |

**Primers for real-time PCR  
(mouse)**

|                |                                                           |
|----------------|-----------------------------------------------------------|
| <i>CPT1A</i>   | F: TGGTGGTGGGTGTGATAT<br>R: GGTGTCTAGGGTCCGATT            |
| <i>CPT1B</i>   | F: GAGACGGACACAGATAGCCC<br>R: TCTTCACTGAGTTCCGATGGG       |
| <i>CPT1C</i>   | F: TTCATCTGCGATCCTGACGAC<br>R: CACTGAGGGGTCAATGCACTC      |
| <i>c-Myc</i>   | F: GATCCGAACACGGAATATCAGG<br>R: GTCCCATGCAAGTTAGGAGT      |
| <i>SLC22A5</i> | F: GATCCGAACACGGAATATCAGG<br>R: GTCCCATGCAAGTTAGGAGT      |
| <i>SOX2</i>    | F: GCGGCAACCAGAAAAACAG<br>R: CTCCGTCTCCGACAAAAGT          |
| <i>OCT4</i>    | F: GGGCTCTCCCATGCATTCAAAC<br>R: CACCTTCCCTCCAACCAGTTGC    |
| <i>NANOG</i>   | F: CACCTTCCCTCCAACCAGTTGC<br>R: GGTGCTGAGGCCTTCTGCGT      |
| <i>INOS</i>    | F: CGGAGCCTTTAGACCTCAACA<br>R: CCCTCGAAGGTGAGCTGAAC       |
| <i>ARG1</i>    | F: TGTCCCTAATGACAGCTCCTT<br>R: GCATCCACCCAAATGACACAT      |
| <i>BBOX1</i>   | F: CTGACAAACGTGGTGAGATCA<br>R: CCACATTGTTGGCATCAATCTTG    |
| <i>GPX4</i>    | F: GCCTGGATAAGTACAGGGGTT<br>R: CATGCAGATCGACTAGCTGAG      |
| <i>ACSL4</i>   | F: TGAACGTATCCCTGGACTAGG<br>R: TCAGACAGTGTAAGGGGTGAA      |
| <i>LPCAT3</i>  | F: CTACCCGTTGGCTCTGTTTTAC<br>R: TGAAGCACGACACATAGCAAG     |
| <i>NRF2</i>    | F: CTGAACTCCTGGACGGGACTA<br>R: CGGTGGGTCTCCGTAATGG        |
| <i>FBXW7</i>   | F: TACAAACTGGAGACGAGGAGAA<br>R: CCACAAAACCTGTAGGCATGTGAT  |
| <i>SKP2</i>    | F: CTACCCGTTGGCTCTGTTTTAC<br>R: TGAAGCACGACACATAGCAAG     |
| <i>β-actin</i> | F: TCATGAAGTGTGACGTGGACATC<br>R: CAGGAGGAGCAATGATCTTGATCT |

**Primers for CHIP assay**

|                 |                                                     |
|-----------------|-----------------------------------------------------|
| ChIP-hCPT1A-BS1 | F: CAGCTTCCGTAGTGCAAACC<br>R: AGATTCACCGCCCCAAGAG   |
| ChIP-hCPT1A-BS2 | F: TGGCCTGTGTCACCAAAATG<br>R: TCCTGGAGCTCCTGATTATCC |

**shRNA sequences (human)**

|             |                       |
|-------------|-----------------------|
| shNC        | TTCTCCGAACGTGTCACGT   |
| shCPT1A-619 | GGATGGGTATGGTCAAGATCT |
| shCPT1A-941 | GGATCTGCTGTATATCCTTCC |

**shRNA sequences (mouse)**

|              |                       |
|--------------|-----------------------|
| ShNC         | TTCTCCGAACGTGTCACGT   |
| shCPT1A-2063 | GCCTCTATGTGGTGTCCAAGT |
| shCPT1A-332  | GCATGATTGCAAAGATCAATC |

---

**Table S3.**

Clinicopathological characteristics of patients from NSCLC tumor tissue array.

| <b>Histologic type</b>       | <b>Characteristics</b> | <b>Patients (<i>n</i>=155)</b> |
|------------------------------|------------------------|--------------------------------|
| <b>Pathology staging</b>     | 1                      | 21                             |
|                              | 2                      | 44                             |
|                              | 3                      | 35                             |
|                              | 4                      | 11                             |
| <b>Tumor size</b>            | T1                     | 36                             |
|                              | T2                     | 103                            |
|                              | T3                     | 10                             |
|                              | T4                     | 6                              |
| <b>Lymph node metastasis</b> | N0                     | 100                            |
|                              | N1                     | 38                             |
|                              | N2                     | 17                             |
| <b>Metastasis</b>            | M0                     | 146                            |
|                              | M1                     | 9                              |
| <b>Gender</b>                | Male                   | 71                             |
|                              | Female                 | 84                             |

**Table S4.**

Clinicopathological characteristics of patients from NSCLC tumor tissue immunohistochemistry.

| <b>Type</b>                  | <b>Case1</b>            | <b>Case2</b>            |
|------------------------------|-------------------------|-------------------------|
| <b>Histologic type</b>       | Invasive adenocarcinoma | Invasive adenocarcinoma |
| <b>Gender</b>                | Female                  | Male                    |
| <b>Age</b>                   | 47                      | 65                      |
| <b>Clinical staging</b>      | Ia2                     | IIa                     |
| <b>Tumor size</b>            | T1b                     | T2b                     |
| <b>Lymph node metastasis</b> | N0                      | N0                      |
| <b>Metastasis</b>            | M0                      | M0                      |
